# Supplementary material for: Versatile interactions of boron fullerene B80with gas molecules
Source: Royal Society of Chemistry journal article supplement (doi:10.1039/c6ra15793a), 2016-01-01
Supplement: c6ra15793a1.pdf [file c6ra15793a1.pdf]

## **SUPPLEMENTARY INFORMATION**

### **Versatile Interactions of Boron Fullerene B-80 with Gas Molecules**

Guilherme Colherinhas,<sup>1</sup> Eudes Eterno Fileti,<sup>2</sup> and Vitaly V. Chaban<sup>2</sup>

1) Departamento de Física-CEPAE, Universidade Federal de Goiás, 74690-900, Goiânia, Brazil.

2) Instituto de Ciência e Tecnologia, Universidade Federal de São Paulo, 12231-280, São José dos Campos, SP, Brazil.

**Table S1.** Geometric parameters of the gas molecules (X) in vacuum and their complexes with the boronfullerene, X@B<sub>80</sub>. Distances are in angstroms, angles and dihedrals are in degrees.

| Parameter | CO <sub>2</sub> | CO <sub>2</sub> @B <sub>80</sub> | Parameter  | H <sub>2</sub> S | H <sub>2</sub> S@B <sub>80</sub> |
|-----------|-----------------|----------------------------------|------------|------------------|----------------------------------|
| R(C-O)    | 1.1828          | 1.1824                           | R(H-S)     | 1.3669           | 1.3732                           |
| R(C-O)    | 1.1828          | 1.1814                           | R(H-S)     | 1.3669           | 1.3667                           |
| A(O-C-O)  | 180.00          | 178.65                           | A(H-S-H)   | 92.74            | 92.28                            |
| Parameter | H <sub>2</sub>  | H <sub>2</sub> @B <sub>80</sub>  | Parameter  | HF               | HF@B <sub>80</sub>               |
| R(H-H)    | 0.7480          | 0.7492                           | R(H-F)     | 0.9402           | 0.9455                           |
| Parameter | SO <sub>2</sub> | SO <sub>2</sub> @B <sub>80</sub> | Parameter  | NH <sub>3</sub>  | NH <sub>3</sub> @B <sub>80</sub> |
| R(S-O)    | 1.4704          | 1.4762                           | R(H-N)     | 1.0260           | 1.0333                           |
| R(O-S-O)  | 119.97          | 118.83                           | A(H-N-H)   | 106.87           | 108.15                           |
|           |                 |                                  | D(N-H-H-H) | -38.88           | -37.05                           |

**Table S2.** Boron-boron bond length alteration due to formation of  $X@B_{80}$  complexes:  $\Delta R(B-B) = R_{B-B}(B_{80}) - R_{B-B}(X@B_{80})$ .  $X = \{CO_2; H_2; H_2S; HF; NH_3; SO_2\}$ . Compare changes in the  $NH_3@B_{80}$  complex to other cases.

| $\Delta R (B-B)$        | Gas molecules |              |               |             |               |               |
|-------------------------|---------------|--------------|---------------|-------------|---------------|---------------|
|                         | $CO_2@B_{80}$ | $H_2@B_{80}$ | $H_2S@B_{80}$ | $HF@B_{80}$ | $NH_3@B_{80}$ | $SO_2@B_{80}$ |
| Max, $10^3 \text{ \AA}$ | +11           | +56          | +1            | +5          | +18           | +4            |
| Min, $10^3 \text{ \AA}$ | -20           | -9           | -76           | -73         | -133          | -73           |

**Table S3.** Molecular orbital (MO) energy levels in the  $B_{80}$  and  $X@B_{80}$  complexes. Localization of MO is designated by capital letters: “(B)” – localized on  $B_{80}$ ; “(M)” – localized on gas molecule; “(D)” – delocalized, i.e. shared by  $B_{80}$  and gas molecule.

| Molecular<br>Orbital | Energy of MO, eV |               |              |               |             |               |               |
|----------------------|------------------|---------------|--------------|---------------|-------------|---------------|---------------|
|                      | $B_{80}$         | $CO_2@B_{80}$ | $H_2@B_{80}$ | $H_2S@B_{80}$ | $HF@B_{80}$ | $NH_3@B_{80}$ | $SO_2@B_{80}$ |
| LUMO+6               | -3.4205          | (B) -3.3666   | (B) -3.3625  | (B) -3.4308   | (D) -3.4589 | (B) -3.0580   | (B) -3.5155   |
| LUMO+5               | -3.5623          | (B) -3.6107   | (B) -3.6113  | (B) -3.6741   | (B) -3.6806 | (D) -3.1906   | (B) -3.5209   |
| LUMO+4               | -3.5737          | (B) -3.6115   | (B) -3.6121  | (B) -3.6768   | (B) -3.6885 | (B) -3.2790   | (B) -3.5277   |
| LUMO+3               | -3.5835          | (B) -3.6181   | (B) -3.6134  | (B) -3.6817   | (D) -3.7087 | (B) -3.3100   | (B) -4.0064   |
| LUMO+2               | -4.0728          | (B) -4.1011   | (B) -4.1019  | (B) -4.1645   | (B) -4.1626 | (D) -3.6727   | (B) -4.0124   |
| LUMO+1               | -4.0826          | (B) -4.1032   | (B) -4.1024  | (B) -4.1672   | (B) -4.1764 | (B) -3.7963   | (B) -4.0183   |
| LUMO                 | -4.0883          | (B) -4.1076   | (B) -4.1043  | (B) -4.1734   | (D) -4.2126 | (B) -3.8050   | (M) -4.5729   |
| HOMO                 | -5.2031          | (B) -5.2053   | (B) -5.2159  | (B) -5.2758   | (B) -5.2665 | (D) -4.6254   | (B) -5.1003   |
| HOMO-1               | -5.2097          | (B) -5.2069   | (B) -5.2167  | (B) -5.2782   | (B) -5.2761 | (B) -4.8981   | (B) -5.1280   |
| HOMO-2               | -5.2167          | (B) -5.2241   | (B) -5.2184  | (B) -5.2826   | (B) -5.3008 | (B) -4.9242   | (B) -5.1340   |
| HOMO-3               | -5.2287          | (B) -5.2320   | (B) -5.2230  | (B) -5.2883   | (B) -5.3087 | (B) -4.9348   | (B) -5.1555   |
| HOMO-4               | -5.2369          | (B) -5.2407   | (B) -5.2238  | (B) -5.2989   | (B) -5.3237 | (B) -4.9550   | (B) -5.1571   |
| HOMO-5               | -5.9558          | (B) -5.9664   | (B) -5.9702  | (M) -5.9332   | (D) -6.0323 | (D) -5.4483   | (B) -5.8597   |
| HOMO-6               | -5.9583          | (B) -5.9680   | (B) -5.9713  | (B) -6.0320   | (B) -6.0372 | (B) -5.6690   | (B) -5.8782   |

**Table S4.** Electronic transitions predicted for B<sub>80</sub> in vacuum and X@B<sub>80</sub> complexes. Transitions with oscillator strength (f) smaller than 0.001 are omitted.

| #                                | Energy, eV | $\lambda$ , nm | $f \times 10^4$ | Primary MO transitions<br>HOMO $\rightarrow$ LUMO+M |
|----------------------------------|------------|----------------|-----------------|-----------------------------------------------------|
| B <sub>80</sub>                  | 1.7037     | 728            | 11              | H-2 $\rightarrow$ L+5 & H-3 $\rightarrow$ L+6       |
|                                  | 1.7064     | 727            | 45              | H-3 $\rightarrow$ L+5 & H-1 $\rightarrow$ L+6       |
|                                  | 1.7123     | 724            | 38              | H-4 $\rightarrow$ L+5                               |
|                                  | 1.7205     | 721            | 28              | H-4 $\rightarrow$ L+6                               |
| CO <sub>2</sub> @B <sub>80</sub> | 1.6733     | 741            | 48              | H-3 $\rightarrow$ L+3 & H-2 $\rightarrow$ L+4       |
|                                  | 1.6761     | 740            | 52              | H-4 $\rightarrow$ L+3 & H-2 $\rightarrow$ L+5       |
|                                  | 1.6835     | 737            | 34              | H-4 $\rightarrow$ L+4                               |
| H <sub>2</sub> @B <sub>80</sub>  | 1.6702     | 742            | 57              | H-2 $\rightarrow$ L+5 & H $\rightarrow$ L+5         |
|                                  | 1.6709     | 742            | 58              | H-2 $\rightarrow$ L+4 & H-3 $\rightarrow$ L+5       |
|                                  | 1.6714     | 742            | 56              | H-3 $\rightarrow$ L+4 & H-3 $\rightarrow$ L+6       |
| H <sub>2</sub> S@B <sub>80</sub> | 1.6593     | 747            | 14              | H-4 $\rightarrow$ L+5 & H-1 $\rightarrow$ L+3       |
|                                  | 1.6683     | 743            | 53              | H-3 $\rightarrow$ L+3                               |
|                                  | 1.6728     | 741            | 54              | H-4 $\rightarrow$ L+3                               |
|                                  | 1.6770     | 739            | 40              | H-4 $\rightarrow$ L+4                               |
|                                  | 1.7698     | 701            | 10              | H-5 $\rightarrow$ L+1                               |
|                                  | 1.7723     | 700            | 21              | H-5 $\rightarrow$ L+2                               |
| HF@B <sub>80</sub>               | 1.6601     | 767            | 22              | H-3 $\rightarrow$ L+4                               |
|                                  | 1.6666     | 744            | 36              | H-3 $\rightarrow$ L+5                               |
|                                  | 1.6755     | 740            | 48              | H-2 $\rightarrow$ L+5                               |
|                                  | 1.6921     | 733            | 24              | H-4 $\rightarrow$ L+5                               |
| NH <sub>3</sub> @B <sub>80</sub> | 1.4003     | 885            | 39              | H $\rightarrow$ L+4                                 |
|                                  | 1.6715     | 742            | 18              | H $\rightarrow$ L+8                                 |
|                                  | 1.6945     | 732            | 32              | H-4 $\rightarrow$ L+3 & H-4 $\rightarrow$ L+4       |
|                                  | 1.7055     | 727            | 44              | H-5 $\rightarrow$ L+1                               |
|                                  | 1.7175     | 722            | 35              | H-4 $\rightarrow$ L+4                               |
|                                  | 1.7677     | 701            | 24              | H-2 $\rightarrow$ L+5                               |
|                                  | 1.7862     | 694            | 13              | H-3 $\rightarrow$ L+5                               |
|                                  | 1.8491     | 671            | 48              | H-5 $\rightarrow$ L+2                               |
|                                  | 1.8645     | 644            | 17              | H-4 $\rightarrow$ L+7                               |
|                                  | 1.9279     | 643            | 23              | H-6 $\rightarrow$ L                                 |
| SO <sub>2</sub> @B <sub>80</sub> | 1.3567     | 914            | 127             | H-7 $\rightarrow$ L                                 |
|                                  | 1.6829     | 737            | 51              | H-4 $\rightarrow$ L+4                               |
|                                  | 1.6850     | 736            | 45              | H-4 $\rightarrow$ L+5                               |
|                                  | 1.6916     | 733            | 33              | H-3 $\rightarrow$ L+6                               |

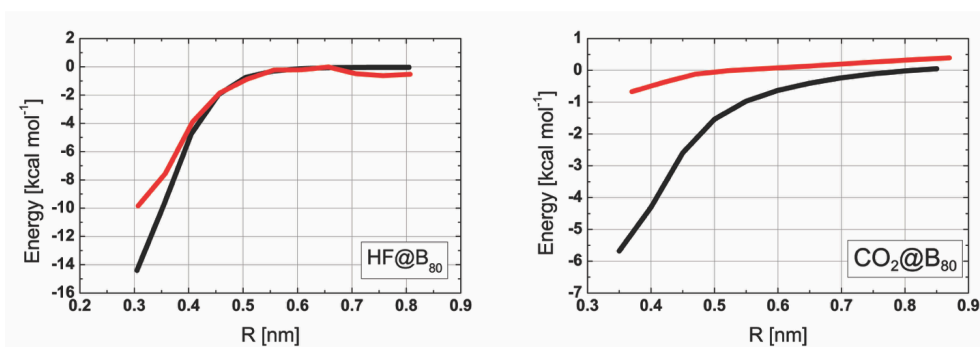

Figure S1: Binding energy versus intermolecular distance for the HF@B<sub>80</sub> and CO<sub>2</sub>@B<sub>80</sub> complexes. Black and red stands for the curves with and without dispersion correction.

Whereas the dispersion correction (black curve) is essential for the proper description of the interaction energy between the counterparts of the complex, the electrostatic component (red curve) is significant and depends crucially on the dipole moment of the gas molecule.
